# Supplementary material for: Prognostic value of quantitative ctDNA levels in non small cell lung cancer patients
Source: PubMed Central journal article supplement (PMC5787483; doi:10.18632/oncotarget.22470), 2017-11-16
Supplement: oncotarget-09-488-s001.pdf [file oncotarget-09-488-s001.pdf]

## Prognostic value of quantitative ctDNA levels in non small cell lung cancer patients

### SUPPLEMENTARY MATERIALS

**Supplementary Table 1: Clinicopathological features of the study population**

| Median age at diagnosis                                  | 61 years (30–83)                       | <i>N</i> | %   |
|----------------------------------------------------------|----------------------------------------|----------|-----|
| Sex                                                      | Women                                  | 23       | 56% |
|                                                          | Men                                    | 18       | 44% |
| Smoking status                                           | Former/quit                            | 19       | 46% |
|                                                          | Never                                  | 22       | 54% |
| Histology                                                | Adenocarcinoma                         | 39       | 95% |
|                                                          | Squamous cell carcinoma                | 2        | 5%  |
| UICC Stage                                               | III                                    | 4        | 10% |
|                                                          | IV                                     | 37       | 90% |
| EGFR mutation                                            | exon 19 deletion                       | 24       | 59% |
|                                                          | exon 20 insertion                      | 3        | 7%  |
|                                                          | G719X                                  | 4        | 10% |
|                                                          | L858R                                  | 10       | 24% |
| Number of treatment lines monitored throughout the study | 1 line                                 | 32       | 78% |
|                                                          | 2 lines                                | 6        | 15% |
|                                                          | 3 lines                                | 3        | 7%  |
| Treatment <sup>1</sup>                                   | 1st line TKI treatment                 | 35       | 85% |
|                                                          | Gefitinib                              | 11       | 27% |
|                                                          | Erlotinib                              | 20       | 49% |
|                                                          | Afatinib                               | 5        | 12% |
|                                                          | Gefitinib + Olaparib                   | 1        | 2%  |
|                                                          | 2nd line TKI treatment                 | 4        | 10% |
|                                                          | Osimertinib                            | 1        | 2%  |
|                                                          | Afatinib + Cetuximab                   | 1        | 2%  |
|                                                          | Erlotinib + Pemetrexed                 | 1        | 2%  |
|                                                          | Gefitinib + Pemetrexed                 | 1        | 2%  |
|                                                          | Non TKI treatment (stage III patients) | 2        | 5%  |
|                                                          | Cisplatin-Vinorelbine                  | 1        | 5%  |
| Pemetrexed                                               | 1                                      | 5%       |     |

<sup>1</sup>Initial treatment within the study period.

**Supplementary Table 2: Progression free survival (PFS) and 95% confidence interval (CI) according to sensitizing mutation**

| Tumor Mutation    | median PFS (in months) | 95% CI   |
|-------------------|------------------------|----------|
| deletion exon 19  | 23.9                   | 8.7–58   |
| G719X             | 3.13                   | NA       |
| L858R             | 12.8                   | 5.4–18.6 |
| insertion exon 20 | 2.4                    | NA       |
| Overall           | 14.2                   | 8.0–23.9 |

**Supplementary Table 3: Limit of detection (LOD) and limit of quantification (LOQ) estimation for rare allele assays according to ICH guidelines. See\_Supplementary\_Table 3**

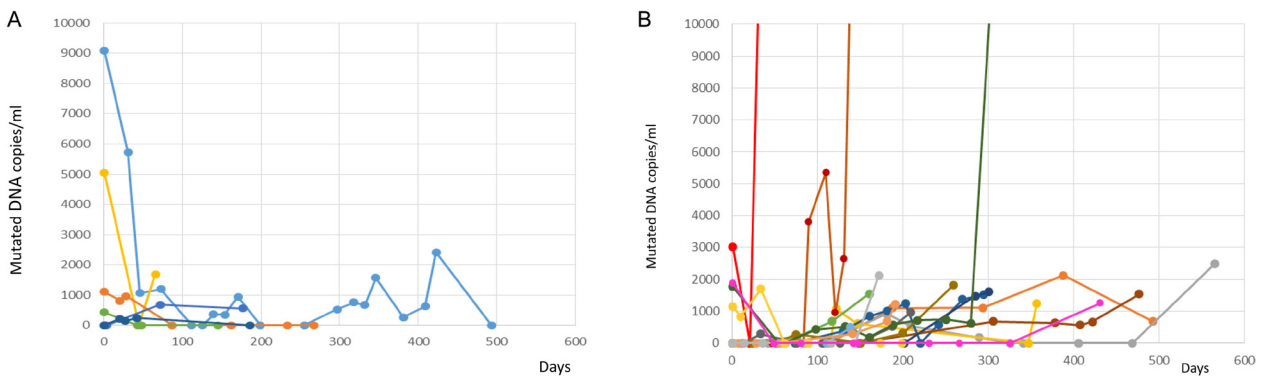

**Supplementary Figure 1: (A) and (B) Performance of EGFR sensitizing mutation assays among non-progressed patients during the study follow-up and had a partial response as their best response (as defined by RECIST criteria).** Only patients with a minimum of four plasma samples extracted at different time points are presented ( $N = 6$ ). As shown in the figure, patients experienced a decrease in EGFR-activating mutation levels. In responding patients plasma EGFR mutations levels fluctuated as much as 9076 copies/ml to undetectable levels. Only patients with a minimum of four plasma samples extracted at different time points are presented ( $N = 17$ ).
